# Supplementary material for: Prognostic Significance of p16 and Its Relationship with Human Papillomavirus Status in Patients with Penile Squamous Cell Carcinoma: Results of 5 Years Follow-Up
Source: MDPI journal article supplement (doi:10.3390/cancers14246024), 2022-12-07
Supplement: s1 [file s1]

**Table S1.** Patient Characteristics.

| Patient Characteristics   |                  |            |
|---------------------------|------------------|------------|
| Covariate                 | Status           | N (%)      |
| HPV                       | negative         | 96(67.1%)  |
|                           | positive         | 47(32.9%)  |
| p16                       | negative         | 98(68.5%)  |
|                           | positive         | 45(31.5%)  |
| Ethnicity                 | Caucasian        | 88(61.5%)  |
|                           | African American | 14(9.8%)   |
|                           | Hispanic         | 40(28%)    |
|                           | Asian            | 1(0.7%)    |
| Tobacco                   | Never            | 56(39.2%)  |
|                           | Active/Former    | 87(60.8%)  |
| Phimosis                  | No               | 81(57.4%)  |
|                           | Yes              | 60(42.6%)  |
| Circumcised               | No               | 101(71.6%) |
|                           | Yes              | 40(28.4%)  |
| Clinical T stage (cT)     | 1                | 45(31.7%)  |
|                           | 2                | 78(54.9%)  |
|                           | 3                | 16(11.3%)  |
|                           | 4                | 3(2.1%)    |
| Clinical N stage (cN)     | 0                | 74(51.7%)  |
|                           | 1                | 28(19.6%)  |
|                           | 2                | 12(8.4%)   |
|                           | 3                | 29(20.3%)  |
| Pathological T stage (pT) | 1                | 37(26.6%)  |
|                           | 2                | 71(51.1%)  |
|                           | 3                | 26(18.7%)  |
|                           | 4                | 5(3.6%)    |
| Pathological N stage (pN) | 0                | 71(51.1%)  |
|                           | 1                | 16(11.5%)  |
|                           | 2                | 12(8.6%)   |
|                           | 3                | 40(28.8%)  |
| Histology                 | usual SCC        | 117(81.8%) |
|                           | basaloid         | 15(10.5%)  |
|                           | pap. NOS         | 3(2.1%)    |
|                           | sarcomatoid      | 1(0.7%)    |
|                           | verrucous        | 5(3.5%)    |
|                           | warty            | 2(1.4%)    |
| Grade                     | 1                | 27(18.9%)  |

|                               |                        |           |
|-------------------------------|------------------------|-----------|
|                               | 2                      | 55(38.5%) |
|                               | 3                      | 61(42.7%) |
| LVI                           | No                     | 71(50.7%) |
|                               | Yes                    | 69(49.3%) |
| Neoadjuvant Chemotherapy      | No                     | 97(67.8%) |
|                               | Yes                    | 46(32.2%) |
| Response to Chemotherapy      | CR                     | 4(8.7%)   |
|                               | PR                     | 16(34.8%) |
|                               | SD                     | 10(21.7%) |
|                               | PD                     | 15(32.6%) |
| Greater than 75% staining p16 | No                     | 98(68.5%) |
|                               | Yes                    | 45(31.5%) |
| p16 IHC staining pattern      | 0                      | 58(40.6%) |
|                               | 1                      | 36(25.2%) |
|                               | 2                      | 17(11.9%) |
|                               | 3                      | 32(22.4%) |
| Survival Status               | No Evidence of Disease | 60(42.6%) |
|                               | Died of Disease        | 42(29.8%) |
|                               | Died                   | 28(19.9%) |
|                               | Alive with Disease     | 11(7.8%)  |

**Table S2. Patient characteristics associated with HPV status.** Some differences observed but percentages are similar to patient characteristics associated with p16 status. .

| Covariate                                                | Status           | HPV = negative        | HPV = positive        | Fisher's Exact Test<br>P-value (2-Tail) |
|----------------------------------------------------------|------------------|-----------------------|-----------------------|-----------------------------------------|
| p16                                                      | Negative         | 87(88.8%)             | 11(11.2%)             | < 0.001                                 |
|                                                          | Positive         | 9(20%)                | 36(80%)               |                                         |
| Age at diagnosis<br>(median, min, max)                   |                  | 96 (58.3, 48.0, 68.6) | 47 (59.7, 49.6, 68.5) | 0.58                                    |
| Number of lymph<br>nodes collected<br>(median, min, max) |                  | 80 (30.0, 20.0, 41.5) | 37 (27, 20, 37)       | 0.54                                    |
| Total Positive Nodes<br>(median, min, max)               |                  | 80 (1, 0, 2.5)        | 38 (1, 0, 2)          | 0.89                                    |
| Ethnicity                                                | Caucasian        | 54(61.4%)             | 34(38.6%)             | 0.050                                   |
|                                                          | African American | 8(57.1%)              | 6(42.9%)              |                                         |
|                                                          | Hispanic         | 33(82.5%)             | 7(17.5%)              |                                         |
|                                                          | Asian            | 1(100%)               |                       |                                         |
| Tobacco Use                                              | Never            | 42(75%)               | 14(25%)               | 0.144                                   |
|                                                          | Active/Former    | 54(62.1%)             | 33(37.9%)             |                                         |
| Phimosis                                                 | No               | 49(60.5%)             | 32(39.5%)             | 0.075                                   |
|                                                          | Yes              | 45(75%)               | 15(25%)               |                                         |
| Circumcised                                              | No               | 71(70.3%)             | 30(29.7%)             | 0.168                                   |
|                                                          | Yes              | 23(57.5%)             | 17(42.5%)             |                                         |
| cT stage                                                 | 1                | 33(73.3%)             | 12(26.7%)             | 0.242                                   |
|                                                          | 2                | 52(66.7%)             | 26(33.3%)             |                                         |
|                                                          | 3                | 8(50%)                | 8(50%)                |                                         |
|                                                          | 4                | 3(100%)               |                       |                                         |
| cN stage                                                 | 0                | 48(64.9%)             | 26(35.1%)             | 0.955                                   |
|                                                          | 1                | 20(71.4%)             | 8(28.6%)              |                                         |
|                                                          | 2                | 8(66.7%)              | 4(33.3%)              |                                         |
|                                                          | 3                | 20(69%)               | 9(31%)                |                                         |
| pT stage                                                 | 1                | 29(78.4%)             | 8(21.6%)              | 0.382                                   |
|                                                          | 2                | 46(64.8%)             | 25(35.2%)             |                                         |
|                                                          | 3                | 16(61.5%)             | 10(38.5%)             |                                         |
|                                                          | 4                | 3(60%)                | 2(40%)                |                                         |
| pN stage                                                 | 0                | 50(70.4%)             | 21(29.6%)             | 0.812                                   |
|                                                          | 1                | 12(75%)               | 4(25%)                |                                         |
|                                                          | 2                | 7(58.3%)              | 5(41.7%)              |                                         |
|                                                          | 3                | 27(67.5%)             | 13(32.5%)             |                                         |
| Grade                                                    | 1                | 23(85.2%)             | 4(14.8%)              | < 0.001                                 |
|                                                          | 2                | 43(78.2%)             | 12(21.8%)             |                                         |
|                                                          | 3                | 30(49.2%)             | 31(50.8%)             |                                         |
| Histology                                                | usual SCC        | 83(70.9%)             | 34(29.1%)             | < 0.001                                 |

|                      |              |           |           |         |
|----------------------|--------------|-----------|-----------|---------|
|                      | basaloid     | 3(20%)    | 12(80%)   |         |
|                      | pap. NOS     | 3(100%)   |           |         |
|                      | sarcomatoid  | 1(100%)   |           |         |
|                      | verrucous    | 5(100%)   |           |         |
|                      | warty        | 1(50%)    | 1(50%)    |         |
| IHC 75% staining     | Less than    | 87(88.8%) | 11(11.2%) | < 0.001 |
|                      | Greater than | 9(20%)    | 36(80%)   |         |
| IHC Staining Pattern | 0            | 53(91.4%) | 5(8.6%)   | < 0.001 |
|                      | 1            | 31(86.1%) | 5(13.9%)  |         |
|                      | 2            | 8(47.1%)  | 9(52.9%)  |         |
|                      | 3            | 4(12.5%)  | 28(87.5%) |         |

**Table S3. Patient characteristics associated with p16 status.** Some differences observed but percentages are similar to patient characteristics associated with HPV status. .

| Covariate                                          | Status           | p16 = negative        | p16 = positive        | Fisher's Exact Test P-value (2-Tail) |
|----------------------------------------------------|------------------|-----------------------|-----------------------|--------------------------------------|
| HPV                                                | negative         | 87(90.6%)             | 9(9.4%)               | < 0.001                              |
|                                                    | positive         | 11(23.4%)             | 36(76.6%)             |                                      |
| Age at diagnosis (median, min, max)                |                  | 98 (59.5, 45.1, 68.8) | 45 (58.2, 49.8, 68.3) | 0.811                                |
| Number of lymph nodes collected (median, min, max) |                  | 81 (30.0, 20.0, 41.0) | 36 (27.0, 18.0, 39.0) | 0.580                                |
| Total Positive Nodes (median, min, max)            |                  | 81 (1, 0, 3)          | 37 (1, 0, 2)          | 0.522                                |
| Ethnicity                                          | Caucasian        | 57(64.8%)             | 31(35.2%)             | 0.050                                |
|                                                    | African American | 7(50%)                | 7(50%)                |                                      |
|                                                    | Hispanic         | 33(82.5%)             | 7(17.5%)              |                                      |
|                                                    | Asian            | 1(100%)               |                       |                                      |
| Tobacco Use                                        | Never            | 44(78.6%)             | 12(21.4%)             | 0.044                                |
|                                                    | Active/Former    | 54(62.1%)             | 33(37.9%)             |                                      |
| Phimosis                                           | No               | 48(59.3%)             | 33(40.7%)             | 0.011                                |
|                                                    | Yes              | 48(80%)               | 12(20%)               |                                      |
| Circumcised                                        | No               | 72(71.3%)             | 29(28.7%)             | 0.231                                |
|                                                    | Yes              | 24(60%)               | 16(40%)               |                                      |
| cT stage                                           | 1                | 32(71.1%)             | 13(28.9%)             | 0.131                                |
|                                                    | 2                | 55(70.5%)             | 23(29.5%)             |                                      |
|                                                    | 3                | 7(43.8%)              | 9(56.3%)              |                                      |
|                                                    | 4                | 3(100%)               |                       |                                      |
| cN stage                                           | 0                | 50(67.6%)             | 24(32.4%)             | 0.946                                |
|                                                    | 1                | 20(71.4%)             | 8(28.6%)              |                                      |
|                                                    | 2                | 9(75%)                | 3(25%)                |                                      |
|                                                    | 3                | 19(65.5%)             | 10(34.5%)             |                                      |
| pT stage                                           | 1                | 27(73%)               | 10(27%)               | 0.271                                |
|                                                    | 2                | 47(66.2%)             | 24(33.8%)             |                                      |
|                                                    | 3                | 15(57.7%)             | 11(42.3%)             |                                      |
|                                                    | 4                | 5(100%)               |                       |                                      |
| pN stage                                           | 0                | 49(69%)               | 22(31%)               | 0.721                                |
|                                                    | 1                | 11(68.8%)             | 5(31.3%)              |                                      |
|                                                    | 2                | 7(58.3%)              | 5(41.7%)              |                                      |
|                                                    | 3                | 30(75%)               | 10(25%)               |                                      |
| Grade                                              | 1                | 23(85.2%)             | 4(14.8%)              | 0.002                                |
|                                                    | 2                | 43(78.2%)             | 12(21.8%)             |                                      |
|                                                    | 3                | 32(52.5%)             | 29(47.5%)             |                                      |

|                      |              |           |           |         |
|----------------------|--------------|-----------|-----------|---------|
| Histology            | usual SCC    | 87(74.4%) | 30(25.6%) | < 0.001 |
|                      | basaloid     | 1(6.7%)   | 14(93.3%) |         |
|                      | pap. NOS     | 3(100%)   |           |         |
|                      | sarcomatoid  | 1(100%)   |           |         |
|                      | verrucous    | 5(100%)   |           |         |
|                      | warty        | 1(50%)    | 1(50%)    |         |
| IHC 75% staining     | Less than    | 98(100%)  |           | < 0.001 |
|                      | Greater than |           | 45(100%)  |         |
| IHC Staining Pattern | 0            | 58(100%)  |           | < 0.001 |
|                      | 1            | 36(100%)  |           |         |
|                      | 2            | 4(23.5%)  | 13(76.5%) |         |
|                      | 3            |           | 32(100%)  |         |

**Table S4. Samples with discordance between HPV and p16 status.** The columns are from right to left – sample ID, HPV status, p16 status determined by HS analysis, percentage of p16 staining, p16 staining pattern, and the HPV analysis used to determine HPV status.

| Sample ID | HPV Status | p16 Status | % Staining | Staining pattern | Cobas or RNAscope |
|-----------|------------|------------|------------|------------------|-------------------|
| 24        | Negative   | Positive   | > 75%      | 2                | Cobas             |
| 29        | Negative   | Positive   | >75%       | 2                | RNAscope          |
| 46        | Negative   | Positive   | >75%       | 3                | RNAscope          |
| 65        | Negative   | Positive   | >75%       | 2                | Cobas             |
| 93        | Negative   | Positive   | >75%       | 2                | Cobas             |
| 126       | Negative   | Positive   | >75%       | 3                | RNAscope          |
| 149       | Negative   | Positive   | >75%       | 3                | RNAscope          |
| 74        | Negative   | Positive   | >75%       | 2                | RNAscope          |
| 119       | Negative   | Positive   | >75%       | 3                | RNAscope          |
| 137       | Positive   | Negative   | < 75%      | 2                | RNAscope          |
| 140       | Positive   | Negative   | < 75%      | 1                | RNAscope          |
| 21        | Positive   | Negative   | < 75%      | 1                | Cobas             |
| 61        | Positive   | Negative   | < 75%      | 0                | Cobas             |
| 19        | Positive   | Negative   | < 75%      | 1                | Cobas             |
| 20        | Positive   | Negative   | < 75%      | 1                | Cobas             |
| 25        | Positive   | Negative   | < 75%      | 0                | Cobas             |
| 35        | Positive   | Negative   | < 75%      | 1                | Cobas             |
| 99        | Positive   | Negative   | < 75%      | 0                | Cobas             |
| 101       | Positive   | Negative   | < 75%      | 0                | Cobas             |
| 112       | Positive   | Negative   | < 75%      | 0                | Cobas             |

**Table S5. Samples that were found to have a p16 staining pattern of 2.** We have separated out the samples that p16 and HPV status matched (Sample ID 1 through 23) and samples that p16 and HPV did not match (Sample ID 24 through 137).

| Sample Number | Sample ID | HPV Status | p16 Status | % Staining | Staining Pattern |
|---------------|-----------|------------|------------|------------|------------------|
|               |           |            |            |            |                  |
| 1             | 1         | Positive   | Positive   | >75%       | 2                |
| 2             | 30        | Positive   | Positive   | >75%       | 2                |
| 3             | 58        | Positive   | Positive   | >75%       | 2                |
| 4             | 68        | Positive   | Positive   | >75%       | 2                |
| 5             | 88        | Positive   | Positive   | >75%       | 2                |
| 6             | 105       | Positive   | Positive   | >75%       | 2                |
| 7             | 111       | Positive   | Positive   | >75%       | 2                |
| 8             | 148       | Positive   | Positive   | >75%       | 2                |
| 9             | 143       | Negative   | Negative   | < 75%      | 2                |
| 10            | 151       | Negative   | Negative   | < 75%      | 2                |
| 11            | 23        | Negative   | Negative   | < 75%      | 2                |
|               |           |            |            |            |                  |
| 1             | 24        | Negative   | Positive   | >75%       | 2                |
| 2             | 29        | Negative   | Positive   | >75%       | 2                |
| 3             | 65        | Negative   | Positive   | >75%       | 2                |
| 4             | 74        | Negative   | Positive   | >75%       | 2                |
| 5             | 93        | Negative   | Positive   | >75%       | 2                |
| 6             | 137       | Positive   | Negative   | < 75%      | 2                |
